# Supplementary material
Source: PubMed Central journal article supplement (PMC7938409)
Supplement: ONCO-25-1032-s001.pdf [file ONCO-25-1032-s001.pdf]

Supplemental Table for:  
Capacity to Provide Geriatric Specialty Care for Older Adults in Community Oncology Practices  
Grant Williams et al.

**Supplemental Table 1. Differences in availability of multidisciplinary care professionals between sites with and without access of geriatrics specialty care.**

| <b>Multidisciplinary Care Professionals</b>                       | <b>Geriatrics Available<br/>N= 77</b> | <b>No Geriatrics Available<br/>N= 207</b> | <i>p</i> -value |
|-------------------------------------------------------------------|---------------------------------------|-------------------------------------------|-----------------|
| Availability of social work at site,%                             | 89.6                                  | 80.8                                      | 0.12            |
| Availability of nurse navigators at site,%                        | 83.1                                  | 79.2                                      | 0.59            |
| Availability of pharmacist at site,%                              | 84.4                                  | 72.3                                      | 0.06            |
| Availability of dietician at site,%                               | 81.8                                  | 65.1                                      | <b>0.01</b>     |
| Availability of supportive caregiver services providers at site,% | 80.5                                  | 53.5                                      | <b>&lt;0.01</b> |
| Availability of rehabilitative medicine at site,%                 | 64.9                                  | 51.5                                      | 0.08            |
| Availability of psychologist at site,%                            | 48.1                                  | 33.1                                      | <b>0.04</b>     |
| Availability of psychiatrist at site,%                            | 42.8                                  | 33.8                                      | 0.23            |
| Availability of integrative health specialist at site,%           | 32.5                                  | 20.8                                      | 0.07            |
| Availability of neuropsychologist at site,%                       | 29.9                                  | 13.1                                      | <b>&lt;0.01</b> |
